# Supplementary material for: Changes in Polyphenols Contents and Antioxidant Capacities of Organically and Conventionally Cultivated Tomato (Solanum lycopersicum L.) Fruits during Ripening
Source: Hindawi journal article supplement (doi:10.1155/2017/2367453), 2017-01-01

## Supplementary material

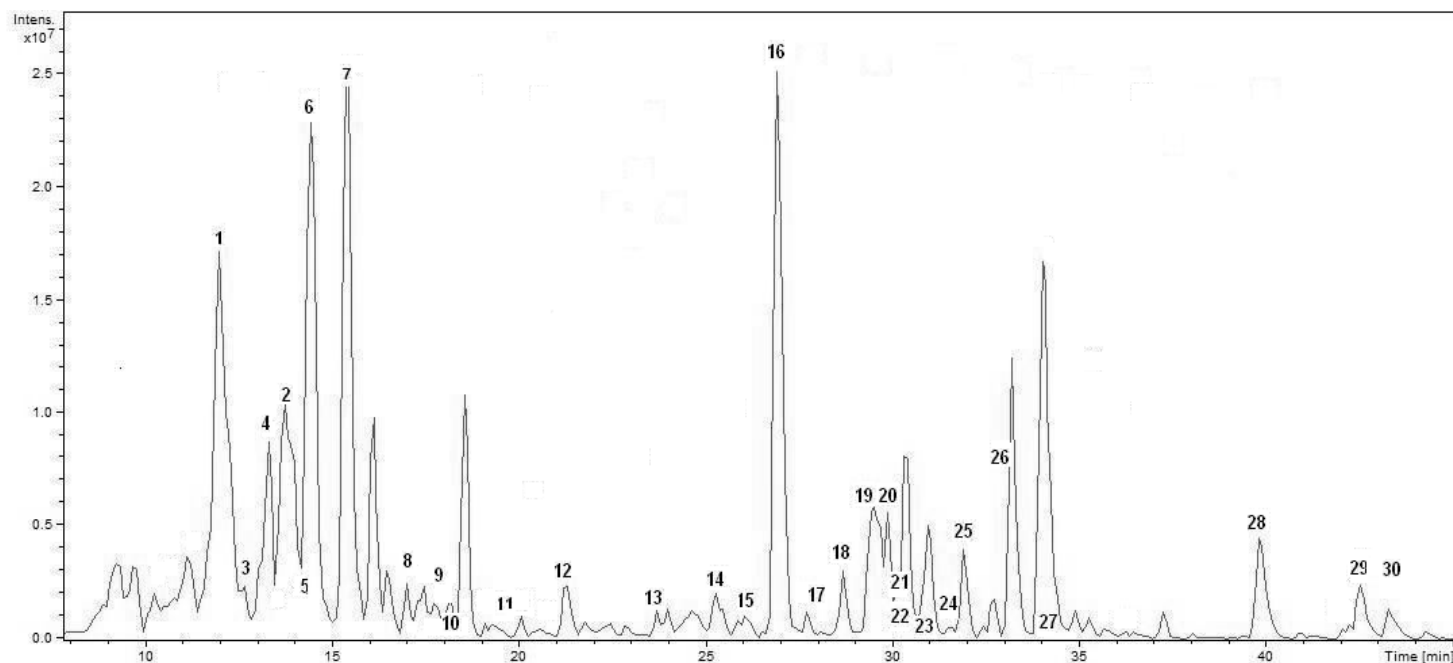

**Figure1.** MS-base peak chromatogram. Phenolic compounds identified by HPLC-MS/MS in tomato fruits in negative ionization mode.

**1** and **2** caffeic acid hexosides ( $m/z$  341), **3** 3-(2-hydroxyphenyl) propanoic acid hexoside ( $m/z$  327), **4** homovanillic acid hexoside ( $m/z$  343), **5** *p*-coumaric acid hexoside ( $m/z$  325), **6** chlorogenic (3-caffeoylquinic) acid ( $m/z$  353), **7** cryptochlorogenic (4-caffeoylquinic) acid ( $m/z$  353), **8** ferulic acid hexoside ( $m/z$  355), **9** neochlorogenic (5-caffeoylquinic) acid ( $m/z$  353), **10** coumaroylquinic acid ( $m/z$  337), **11** rutin hexoside ( $m/z$  771), **12** apigenin acetylhexoside ( $m/z$  473), **13** quercetin dihexoside ( $m/z$  625), **14** eriodictyol hexoside ( $m/z$  449), **15** rutin pentoside ( $m/z$  741), **16** quercetin rutinoside (rutin) ( $m/z$  609), **17** kaempferol rutinoside pentoside ( $m/z$  725), **18** phloretin dihexoside ( $m/z$  597), **19** naringenin hexoside ( $m/z$  433) **20** dicaffeoylquinic acid I ( $m/z$  515), **21** dicaffeoylquinic acid II ( $m/z$  515), **22** kaempferol rutinosid ( $m/z$  593), **23** naringin ( $m/z$  579), **24** caffeic acid derivative ( $m/z$  487), **25** dihydrocaffeic acid dihexoside ( $m/z$  505), **26** dicaffeoylquinic acid III ( $m/z$  515), **27** eriodictyol ( $m/z$  287), **28** naringenin ( $m/z$  271), **29** tricaffeoylquinic acid ( $m/z$  677), **30** naringenin chalcone ( $m/z$  271).

## Figures 2-7. Mass spectra of selected compounds

homovanillic acid hexoside

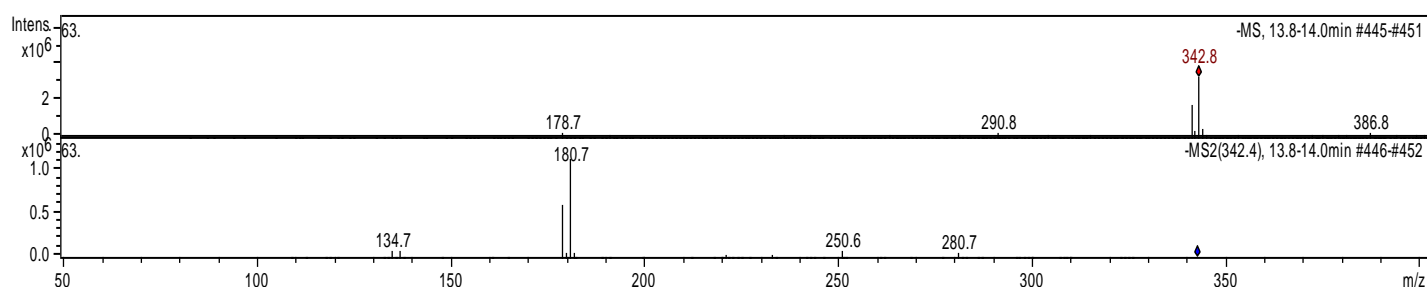

### dihydrocaffeic acid dihexoside

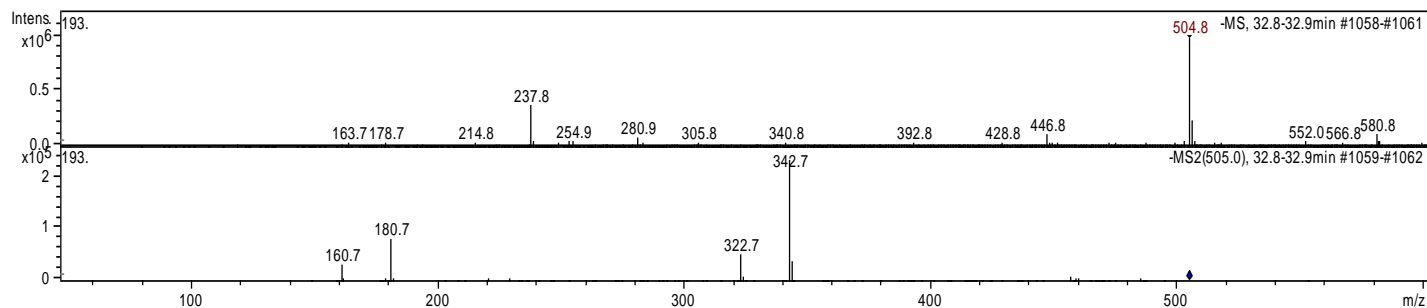

### naringenin chalcone

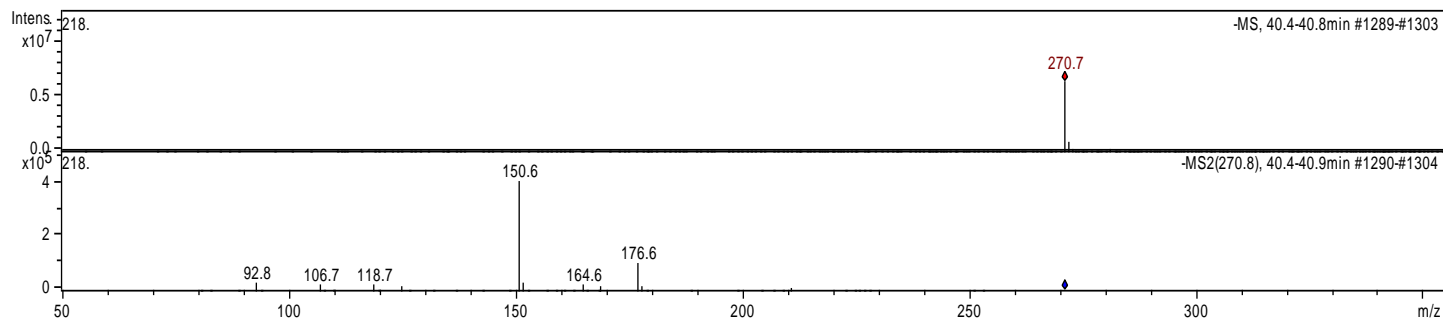

### phloretin dihexoside

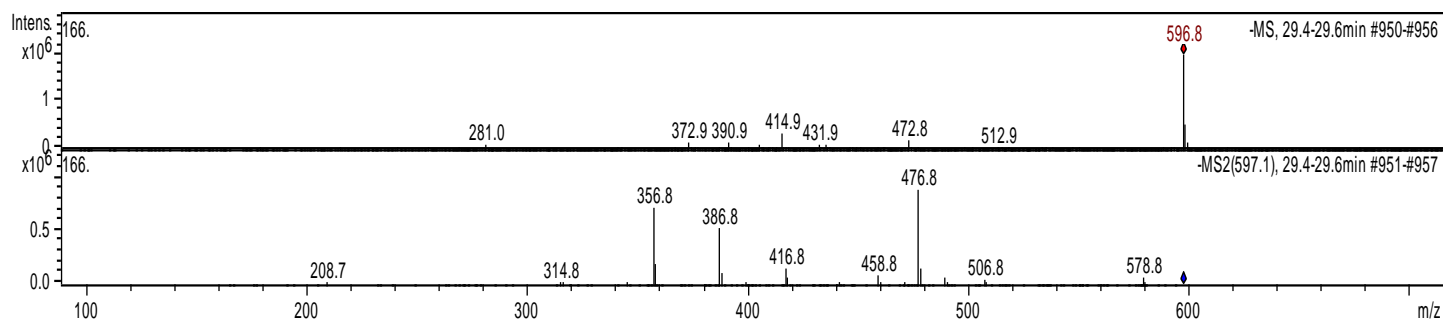

### apigenin acetylhexoside (m/z 473)

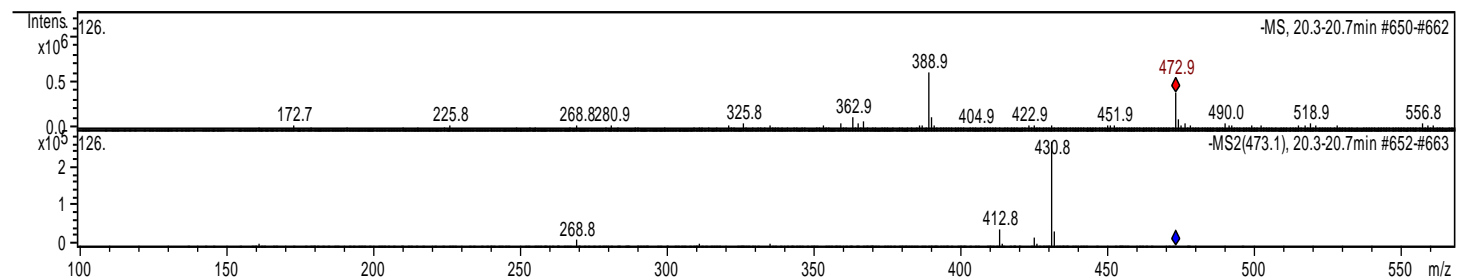

### kaempferol rutinoside pentoside

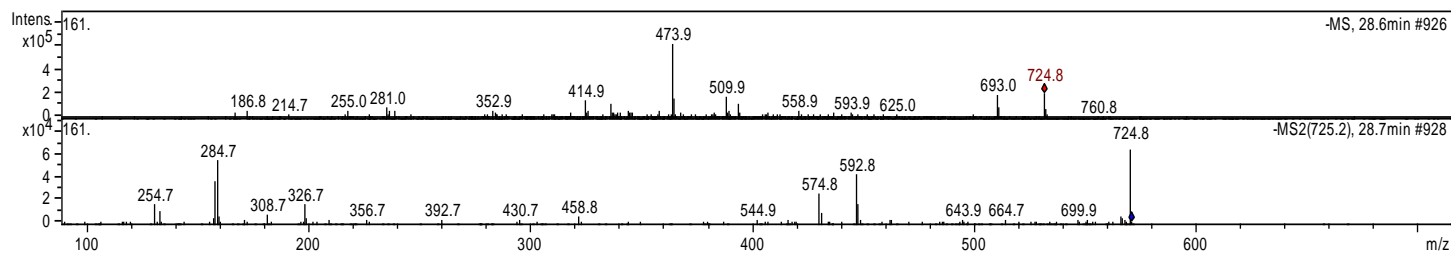

**Figures 8-37:** Dynamic patterns of all studied polyphenols (mean  $\pm$  standard deviation of peak area) during ripening of tomato fruits.

### Hydroxyphenylacetic acids

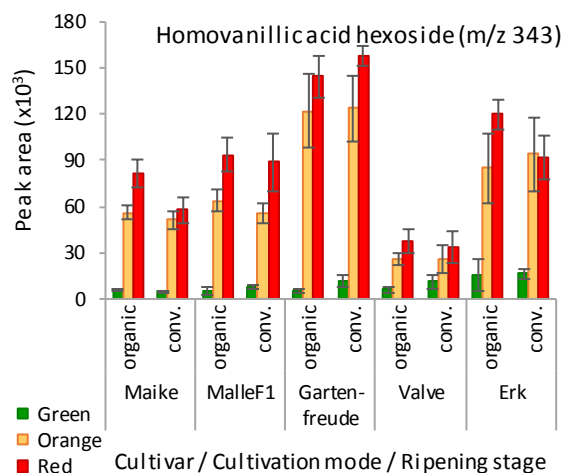

### Hydroxycinnamic acids

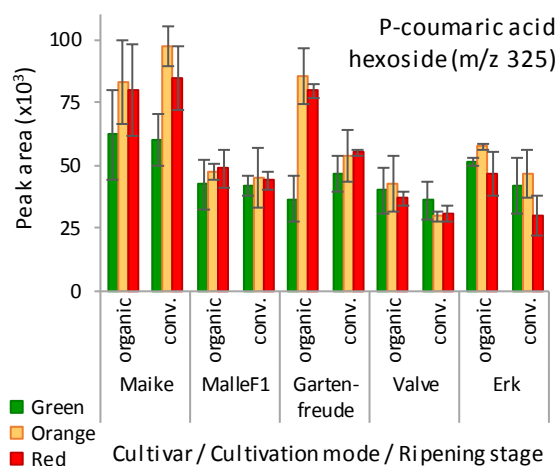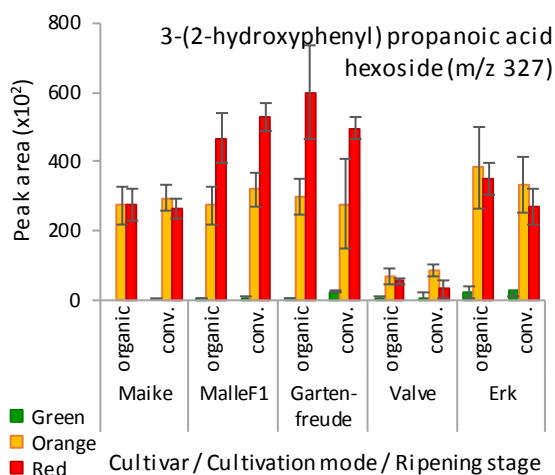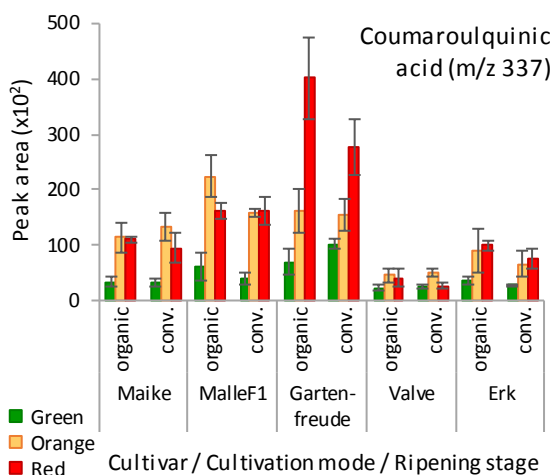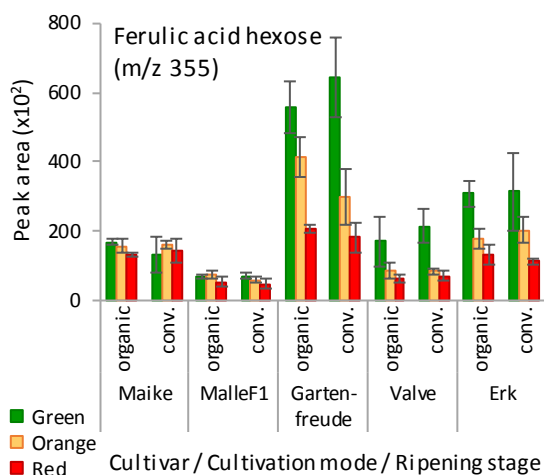

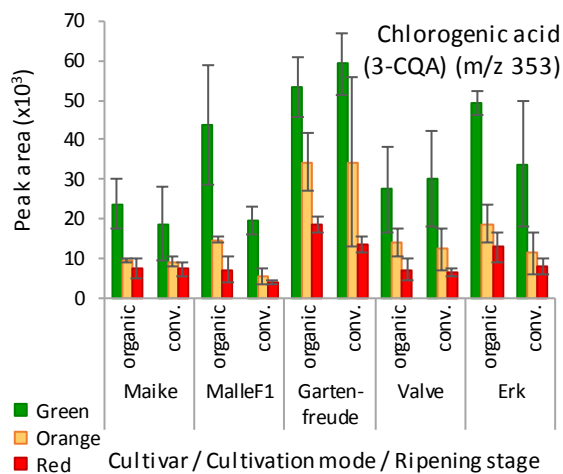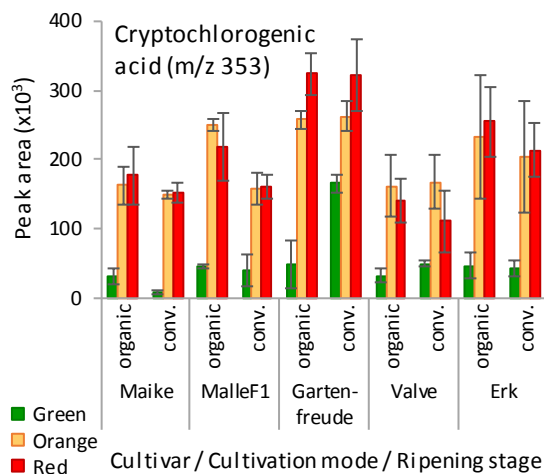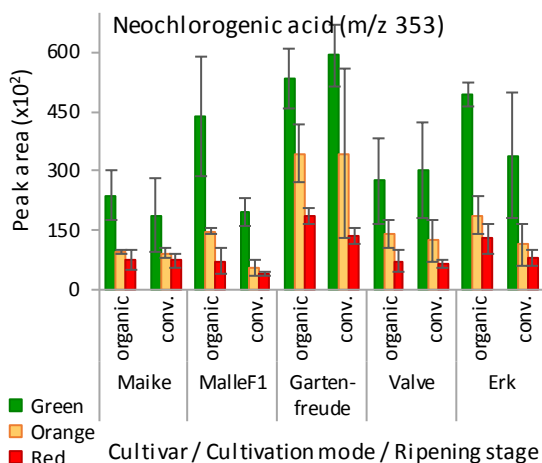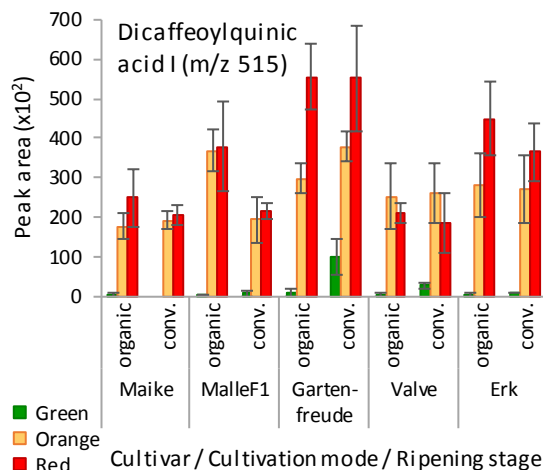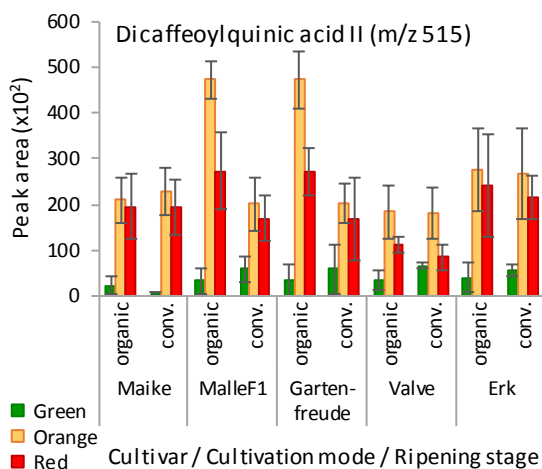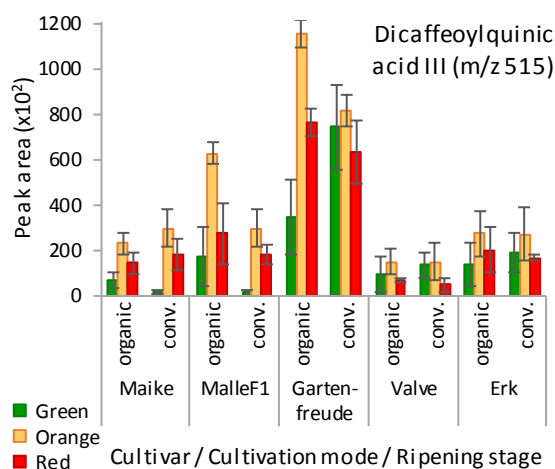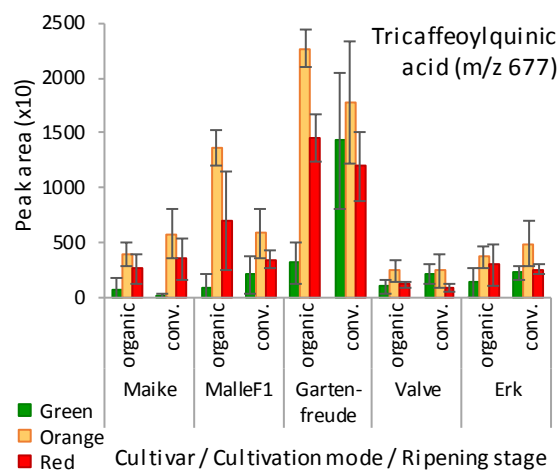

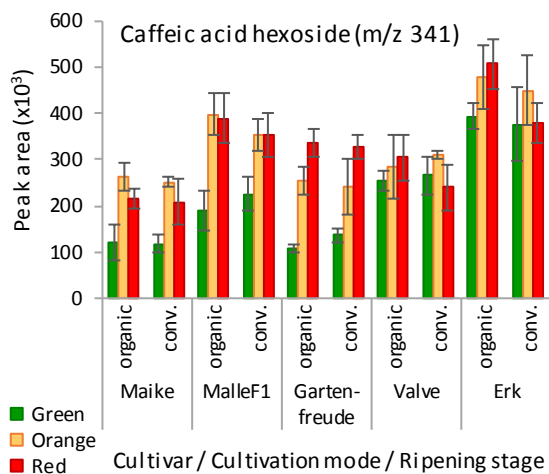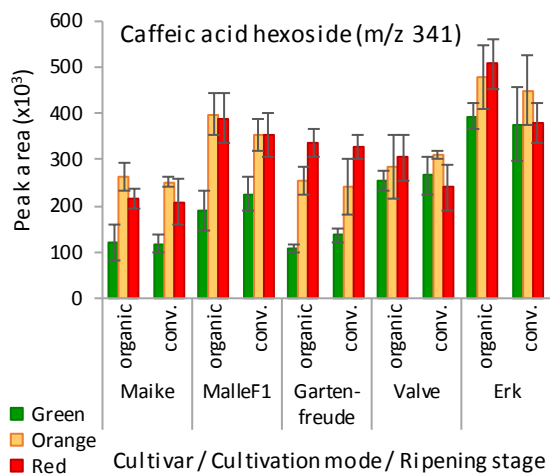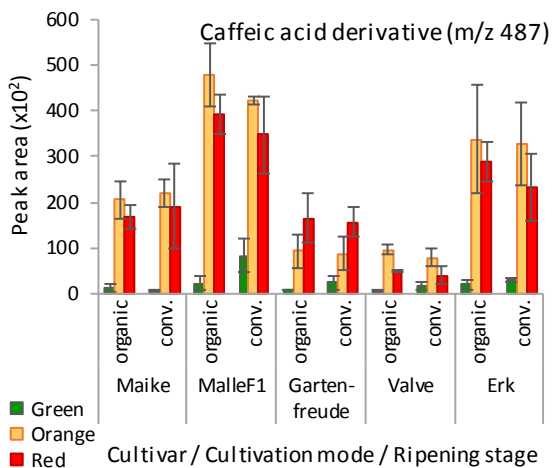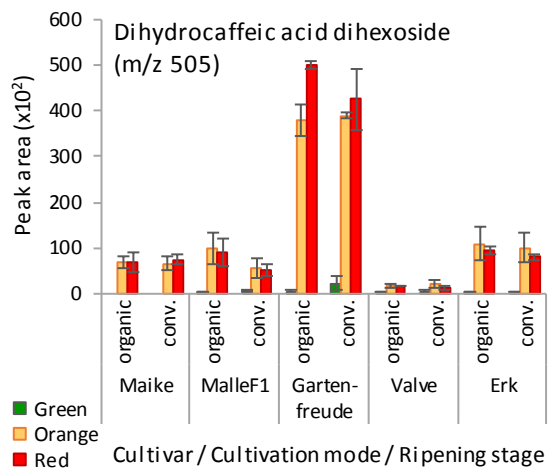

## Chalcones

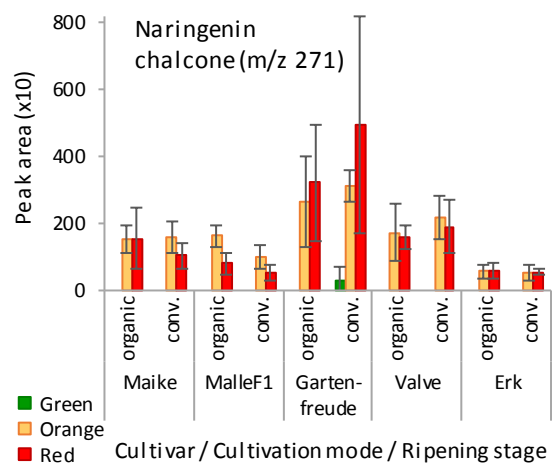

## Dihydrochalcones

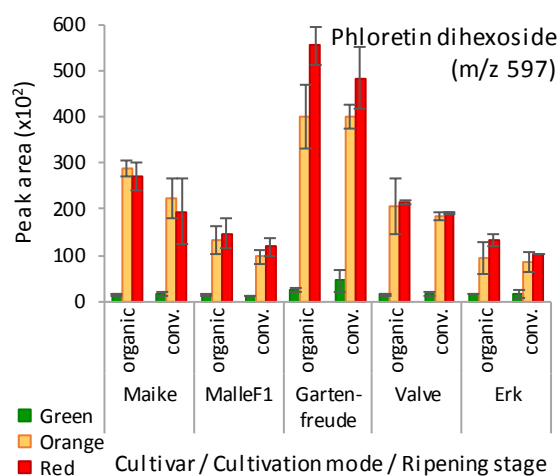

## Flavones

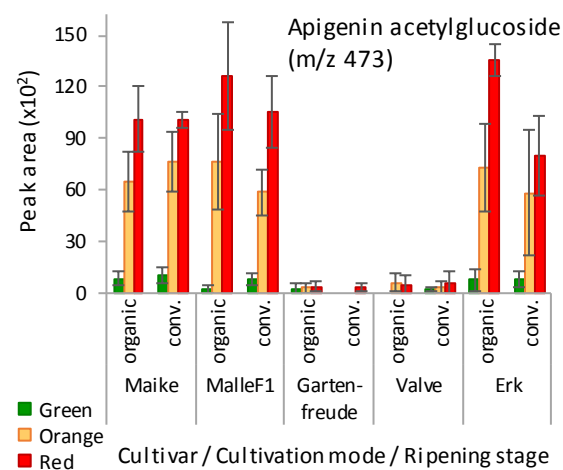

## Flavonols

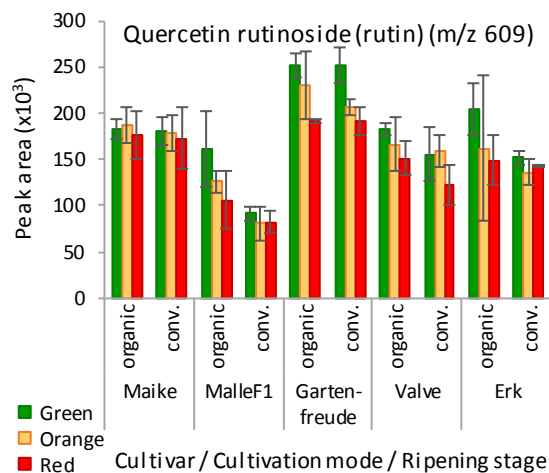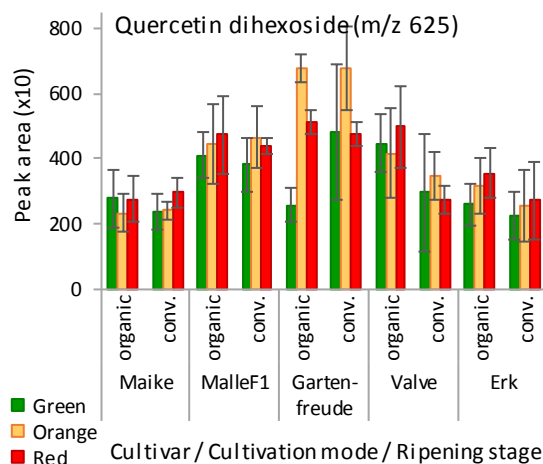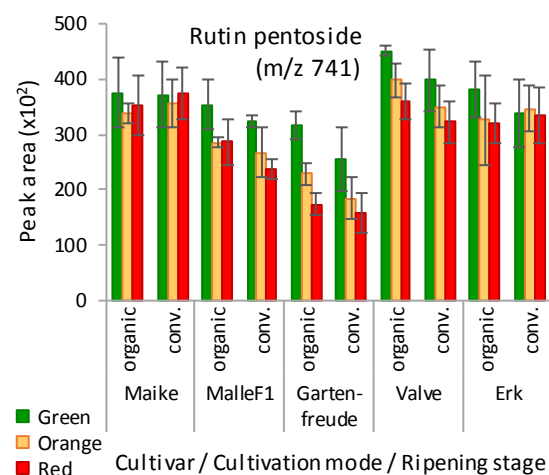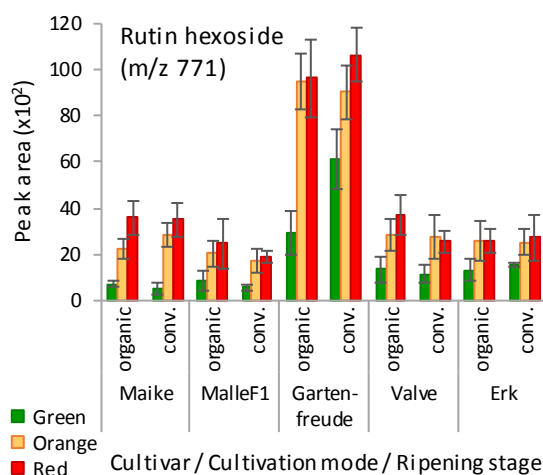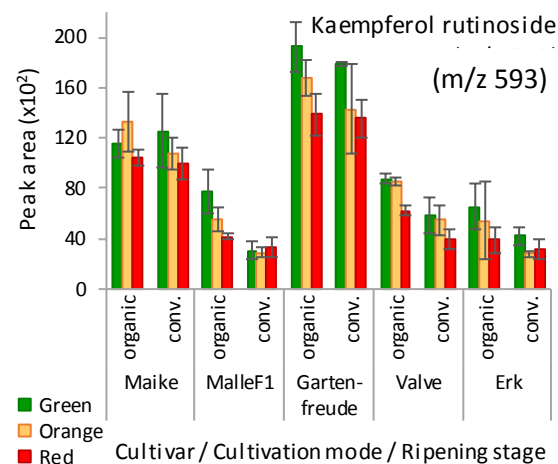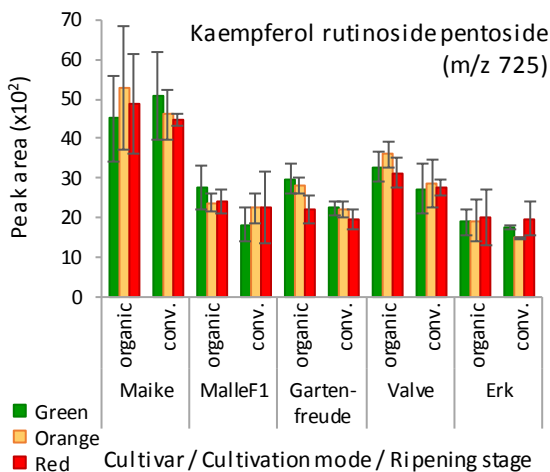

## Flavanones

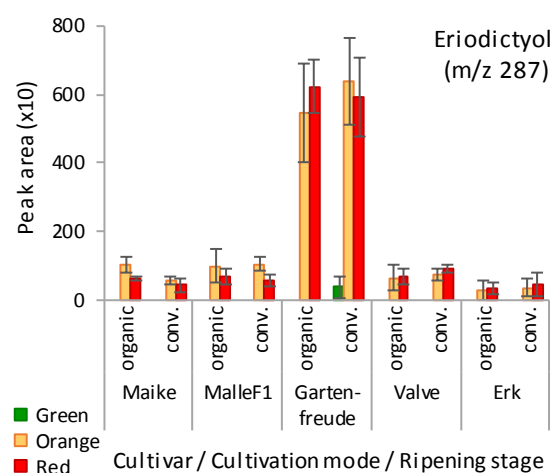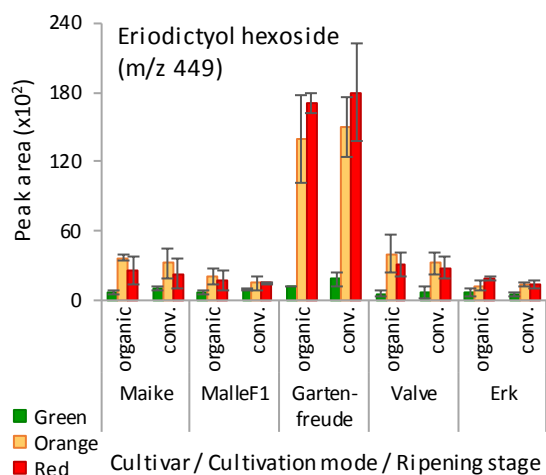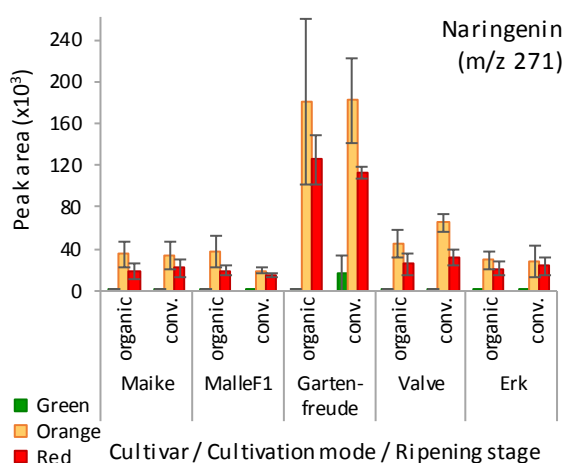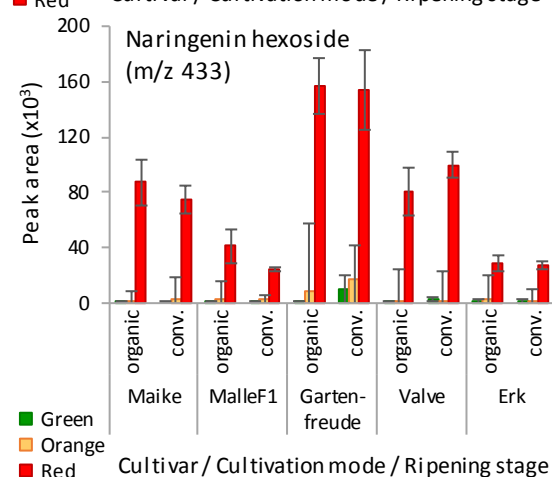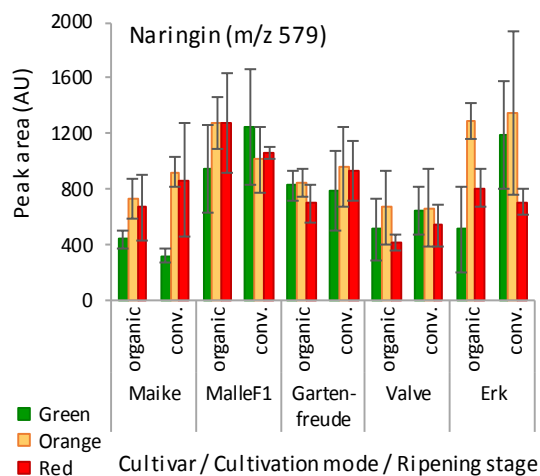

Supplement: f1 [file 2367453.f1.pdf]
